# Supplementary material for: The RIN: an RNA integrity number for assigning integrity values to RNA measurements
Source: Springer Nature journal article supplement (doi:10.1186/1471-2199-7-3), 2006-01-31
Supplement: 12867_2005_92_MOESM1_ESM.pdf [file 12867_2005_92_MOESM1_ESM.pdf]

## **Software Availability**

The Agilent 2100 bioanalyzer system software can be downloaded from Agilent's webpage. Version B.01.03 and later will allow for measurement reviews (free of licenses) including the calculation of the RNA integrity number: <http://www.agilent.com/chem/labonachip>

Up-to-date information for the RIN Software and about the RIN-Project is available at

<http://www.agilent.com/chem/RIN> and <http://www.quantiom.com/RIN>
