# Supplementary material for: The RIN: an RNA integrity number for assigning integrity values to RNA measurements
Source: Springer Nature journal article supplement (doi:10.1186/1471-2199-7-3), 2006-01-31
Supplement: 12867_2005_92_MOESM2_ESM.pdf [file 12867_2005_92_MOESM2_ESM.pdf]

## Description of the total set of features computed

Table 1: The table list the names of the regions and their definition

| <b>Name</b>      | <b>Description</b>                                                    |
|------------------|-----------------------------------------------------------------------|
| pre-region       | The segment preceeding the lower marker is designated the pre-region. |
| marker-region    | The area occupied by the lower-marker peak                            |
| 5S-region        | covers the small rRNA fragments (5S and 5.8S rRNA, and tRNA)          |
| fast-region      | lies between the 5S-region and the 18S-region                         |
| 18S-region       | covers the 18S peak                                                   |
| 28S-region       | covers 28S peak                                                       |
| inter-region     | lies between the 18S-region and the 28S-region                        |
| precursor-region | covers the pre-cursor RNA following the 28S-region                    |
| post-region      | part of the signal that lies beyond the precursor-region              |

Table 2: The table gives for each used feature a short description of its semantics

| <b>Feature</b>                        | <b>Description</b>                                                                                                         |
|---------------------------------------|----------------------------------------------------------------------------------------------------------------------------|
| <b>Fragment resp. marker features</b> |                                                                                                                            |
| fragmentarea                          | area of the fragment                                                                                                       |
| area                                  | area under the curve                                                                                                       |
| found                                 | fragment/marker recognized                                                                                                 |
| height                                | height of a fragment/marker                                                                                                |
| max                                   | max value of the fragment/marker                                                                                           |
| <b>Region features</b>                |                                                                                                                            |
| area                                  | area under the curve in the region                                                                                         |
| cuttedarea                            | area under the curve with peaks cutted off                                                                                 |
| abovecuttedarea                       | sum of the cutted off peak areas                                                                                           |
| line(1)                               | slope of the interpolated straight line                                                                                    |
| line(2)                               | intercept of the interpolated straight line                                                                                |
| startval                              | value of the interpolated straight line at the beginning of the region                                                     |
| endval                                | value of the interpolated straight line at the end of the region                                                           |
| median                                | median value of the region                                                                                                 |
| mean                                  | mean value of the region                                                                                                   |
| max                                   | max value of the region                                                                                                    |
| min                                   | min value of the region                                                                                                    |
| runmindeviation                       | max deviation of the running minimum and the current signal value                                                          |
| runmaxdeviation                       | max deviation of the running maximum and the current signal value.                                                         |
| arearatio                             | area ratio of the region and the total area under the curve                                                                |
| countintpeaks                         | number of peaks found by the integrator inside the region                                                                  |
| meme                                  | ratio of region's mean and median (is helpful for spike detection)                                                         |
| <b>Global features</b>                |                                                                                                                            |
| ratio18_fast                          | area ratio of 18S fragment and fast region                                                                                 |
| ratio28_fast                          | area ratio of 28S fragment and fast region                                                                                 |
| ratio1828_fast                        | area ratio of both ribosomal fragments and fast region                                                                     |
| ratio18_inter                         | area ratio of 18S fragment and inter region                                                                                |
| ratio28_inter                         | area ratio of 28S fragment and inter region                                                                                |
| ratio1828_inter                       | area ratio of both ribosomal fragments and inter region                                                                    |
| ratio18_fastinter                     | area ratio of 18S fragment and both fast region and inter region                                                           |
| ratio28_fastinter                     | area ratio of 28S fragment and both fast region and inter region                                                           |
| ratio1828_fastinter                   | area ratio of both ribosomal fragments and fast + inter region                                                             |
| arearatio2818                         | area ratio of 28S fragment and 18S fragment                                                                                |
| ratio18_fastmedian                    | area ratio of 18S fragment and median value of fast region - our counterpart to the degradation factor                     |
| totalrnratio                          | area ratio of both ribosomal fragments to the total area under the curve (reaching from 5S region to the precursor region) |
| SNR                                   | signal noise ratio                                                                                                         |
| NSD                                   | noise standard deviation                                                                                                   |
| baseline(1)                           | slope of the baseline, put through the lowest points of the pre region and post region                                     |
| baseline(2)                           | intercept of the baseline                                                                                                  |
