# Supplementary figures and images for: The RIN: an RNA integrity number for assigning integrity values to RNA measurements
Source: Springer Nature journal article supplement (doi:10.1186/1471-2199-7-3), 2006-01-31

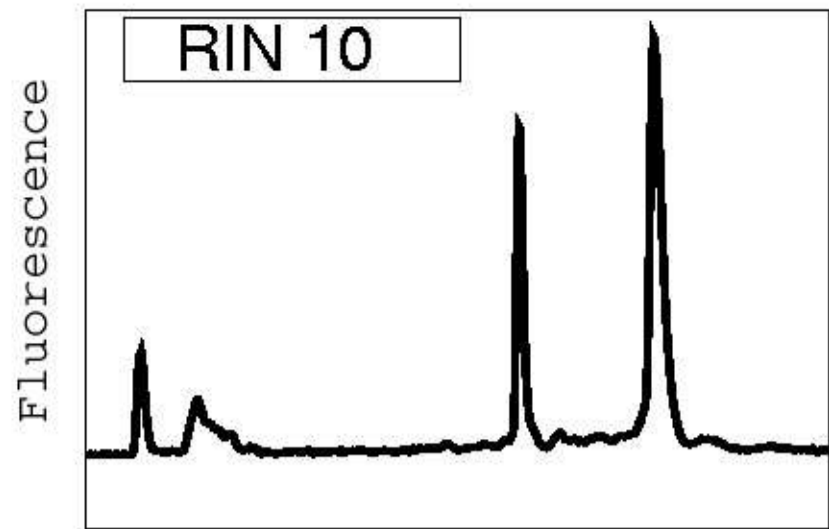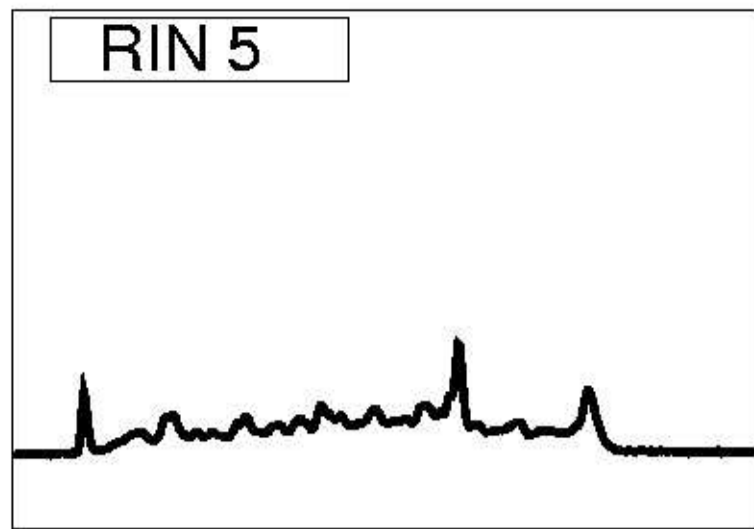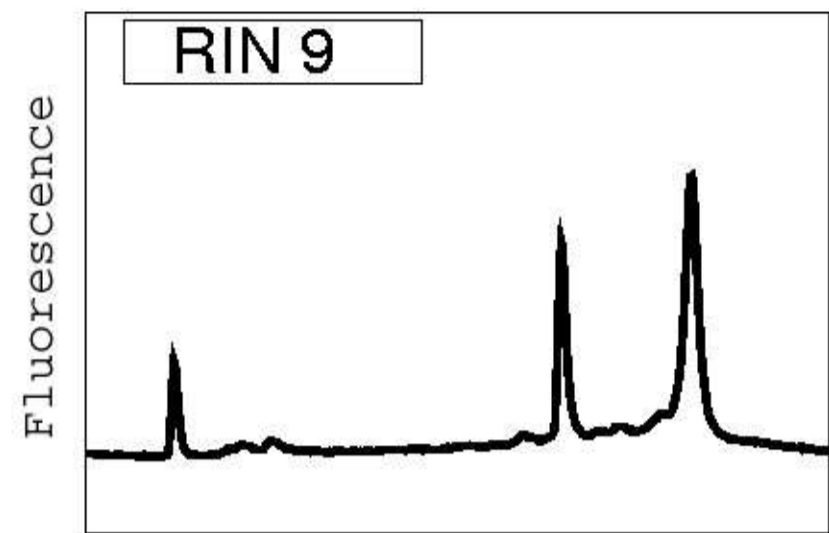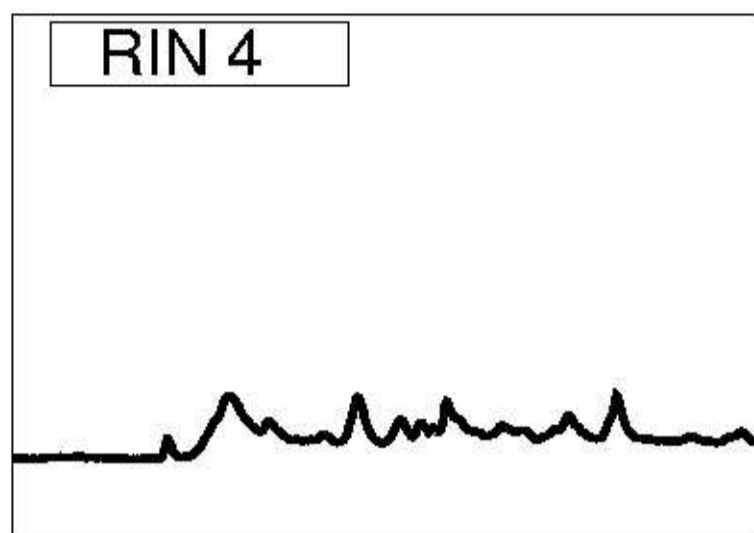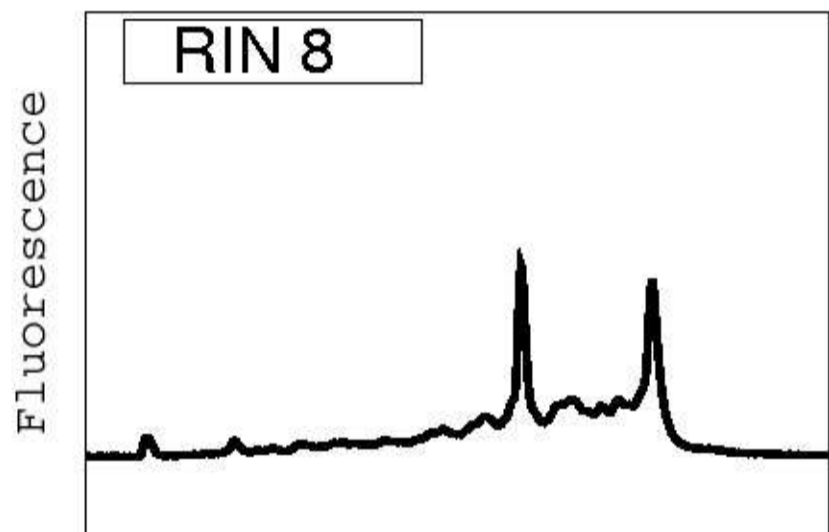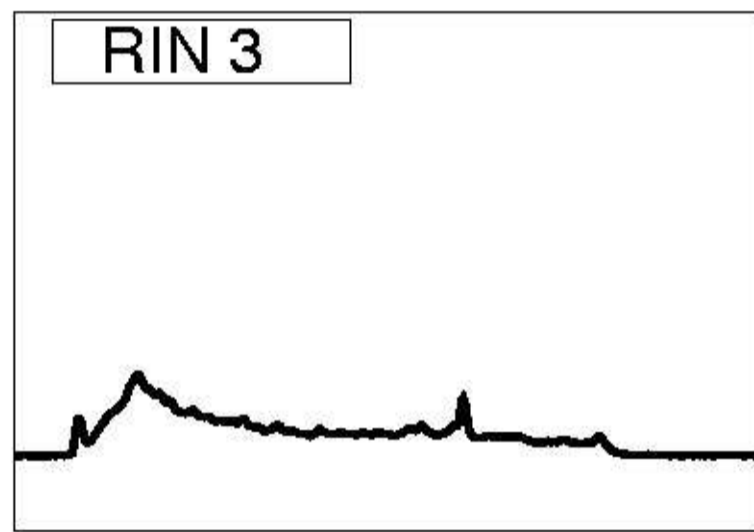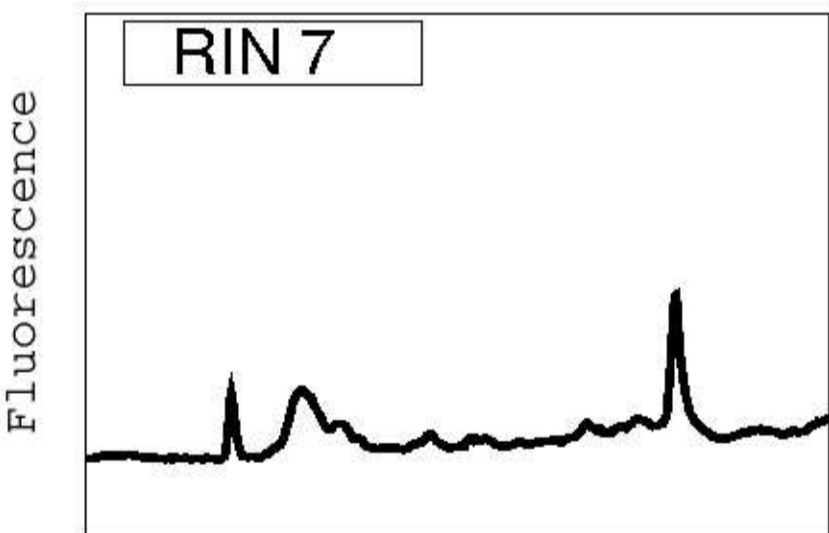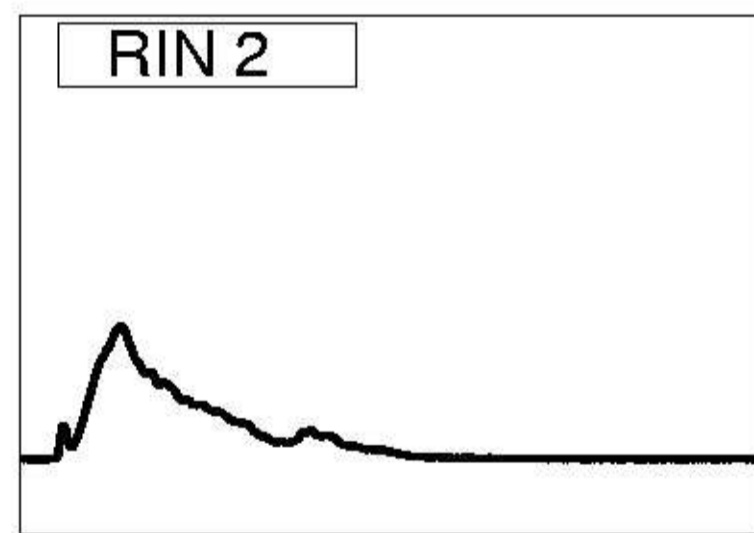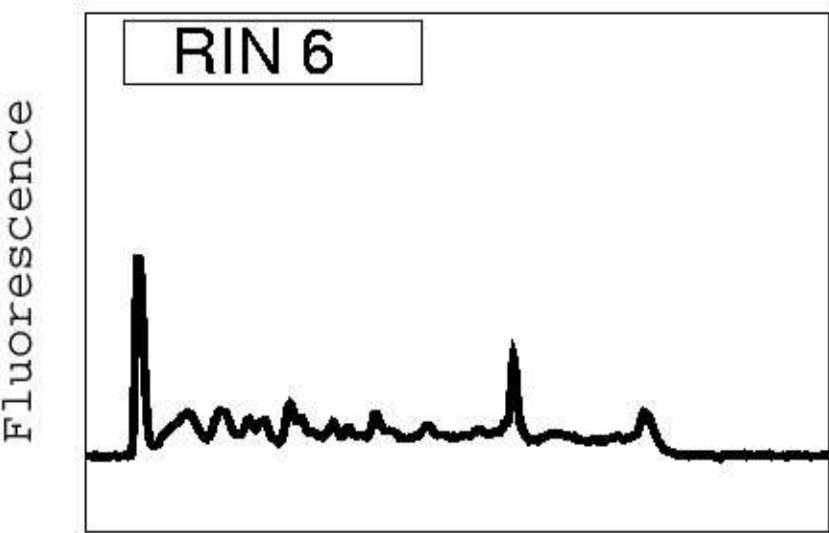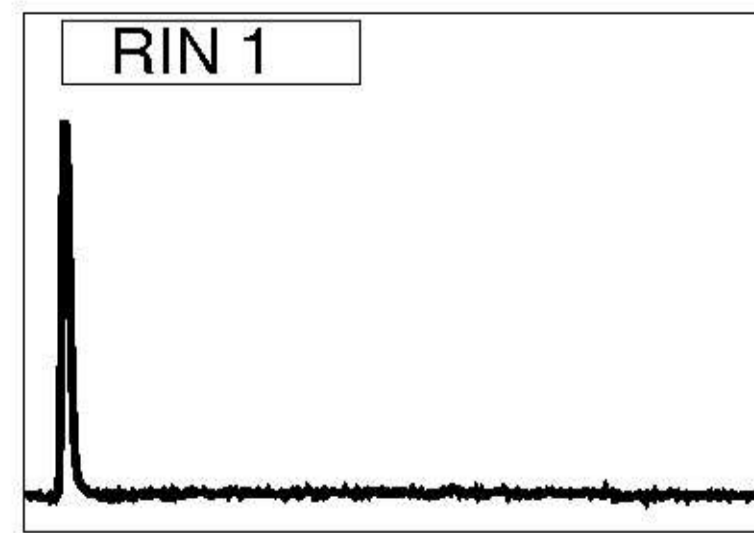

time

time

Supplement: 12867_2005_92_MOESM4_ESM.pdf [file 12867_2005_92_MOESM4_ESM.pdf]

model evidence

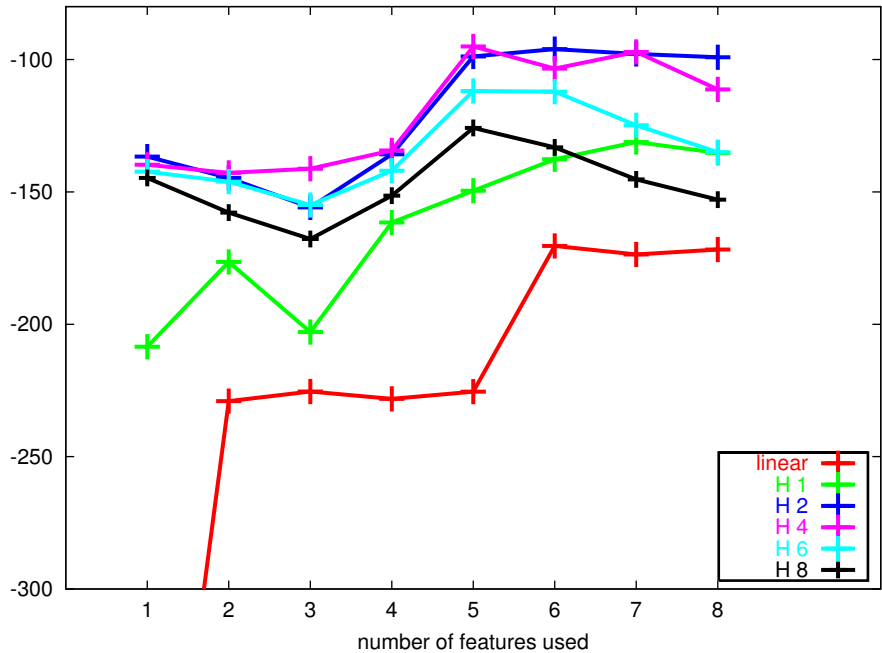

Supplement: 12867_2005_92_MOESM5_ESM.pdf [file 12867_2005_92_MOESM5_ESM.pdf]

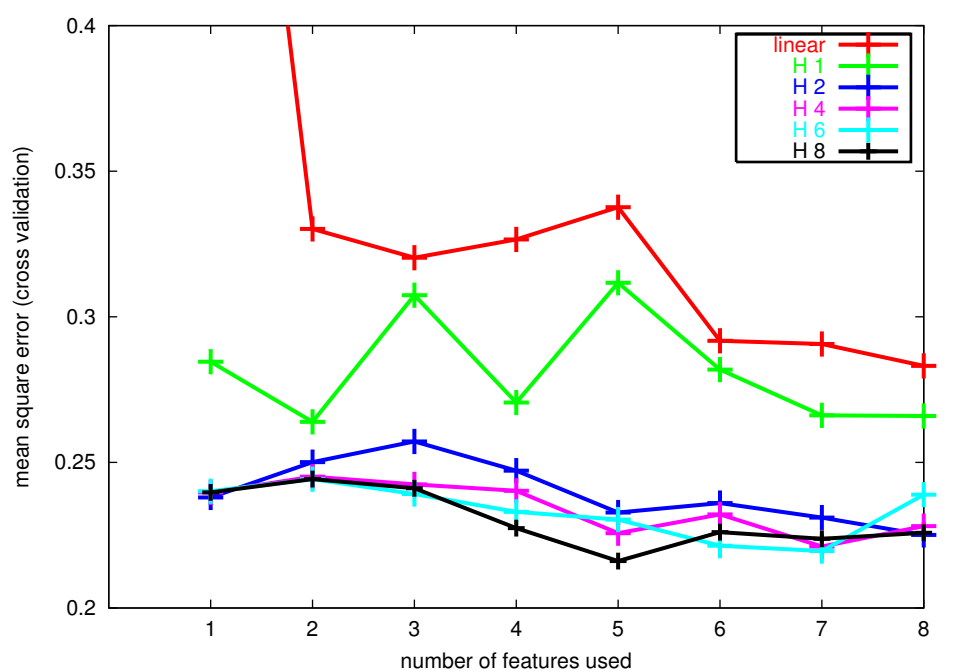

Supplement: 12867_2005_92_MOESM6_ESM.pdf [file 12867_2005_92_MOESM6_ESM.pdf]

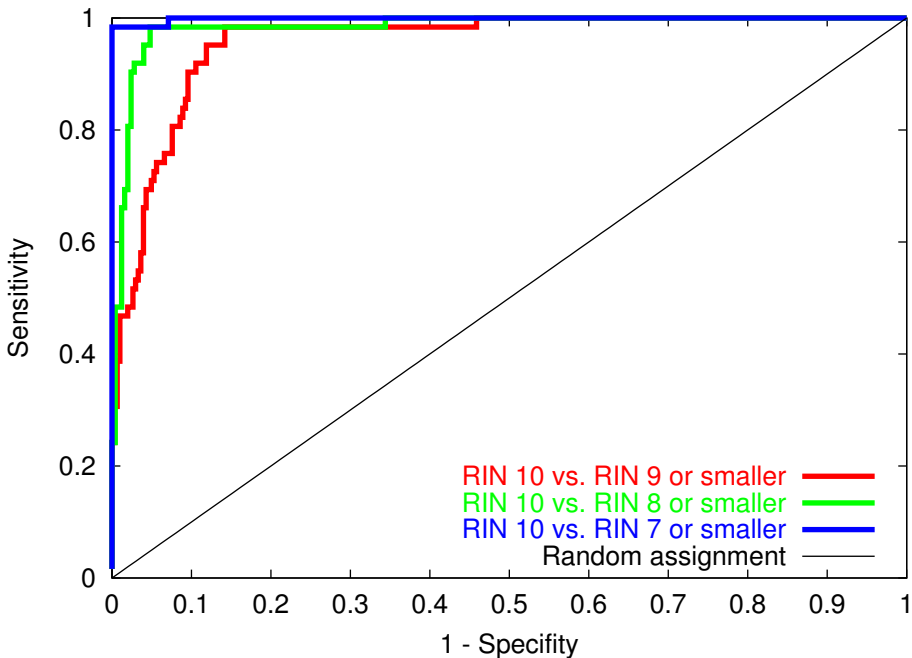

Supplement: 12867_2005_92_MOESM7_ESM.pdf [file 12867_2005_92_MOESM7_ESM.pdf]

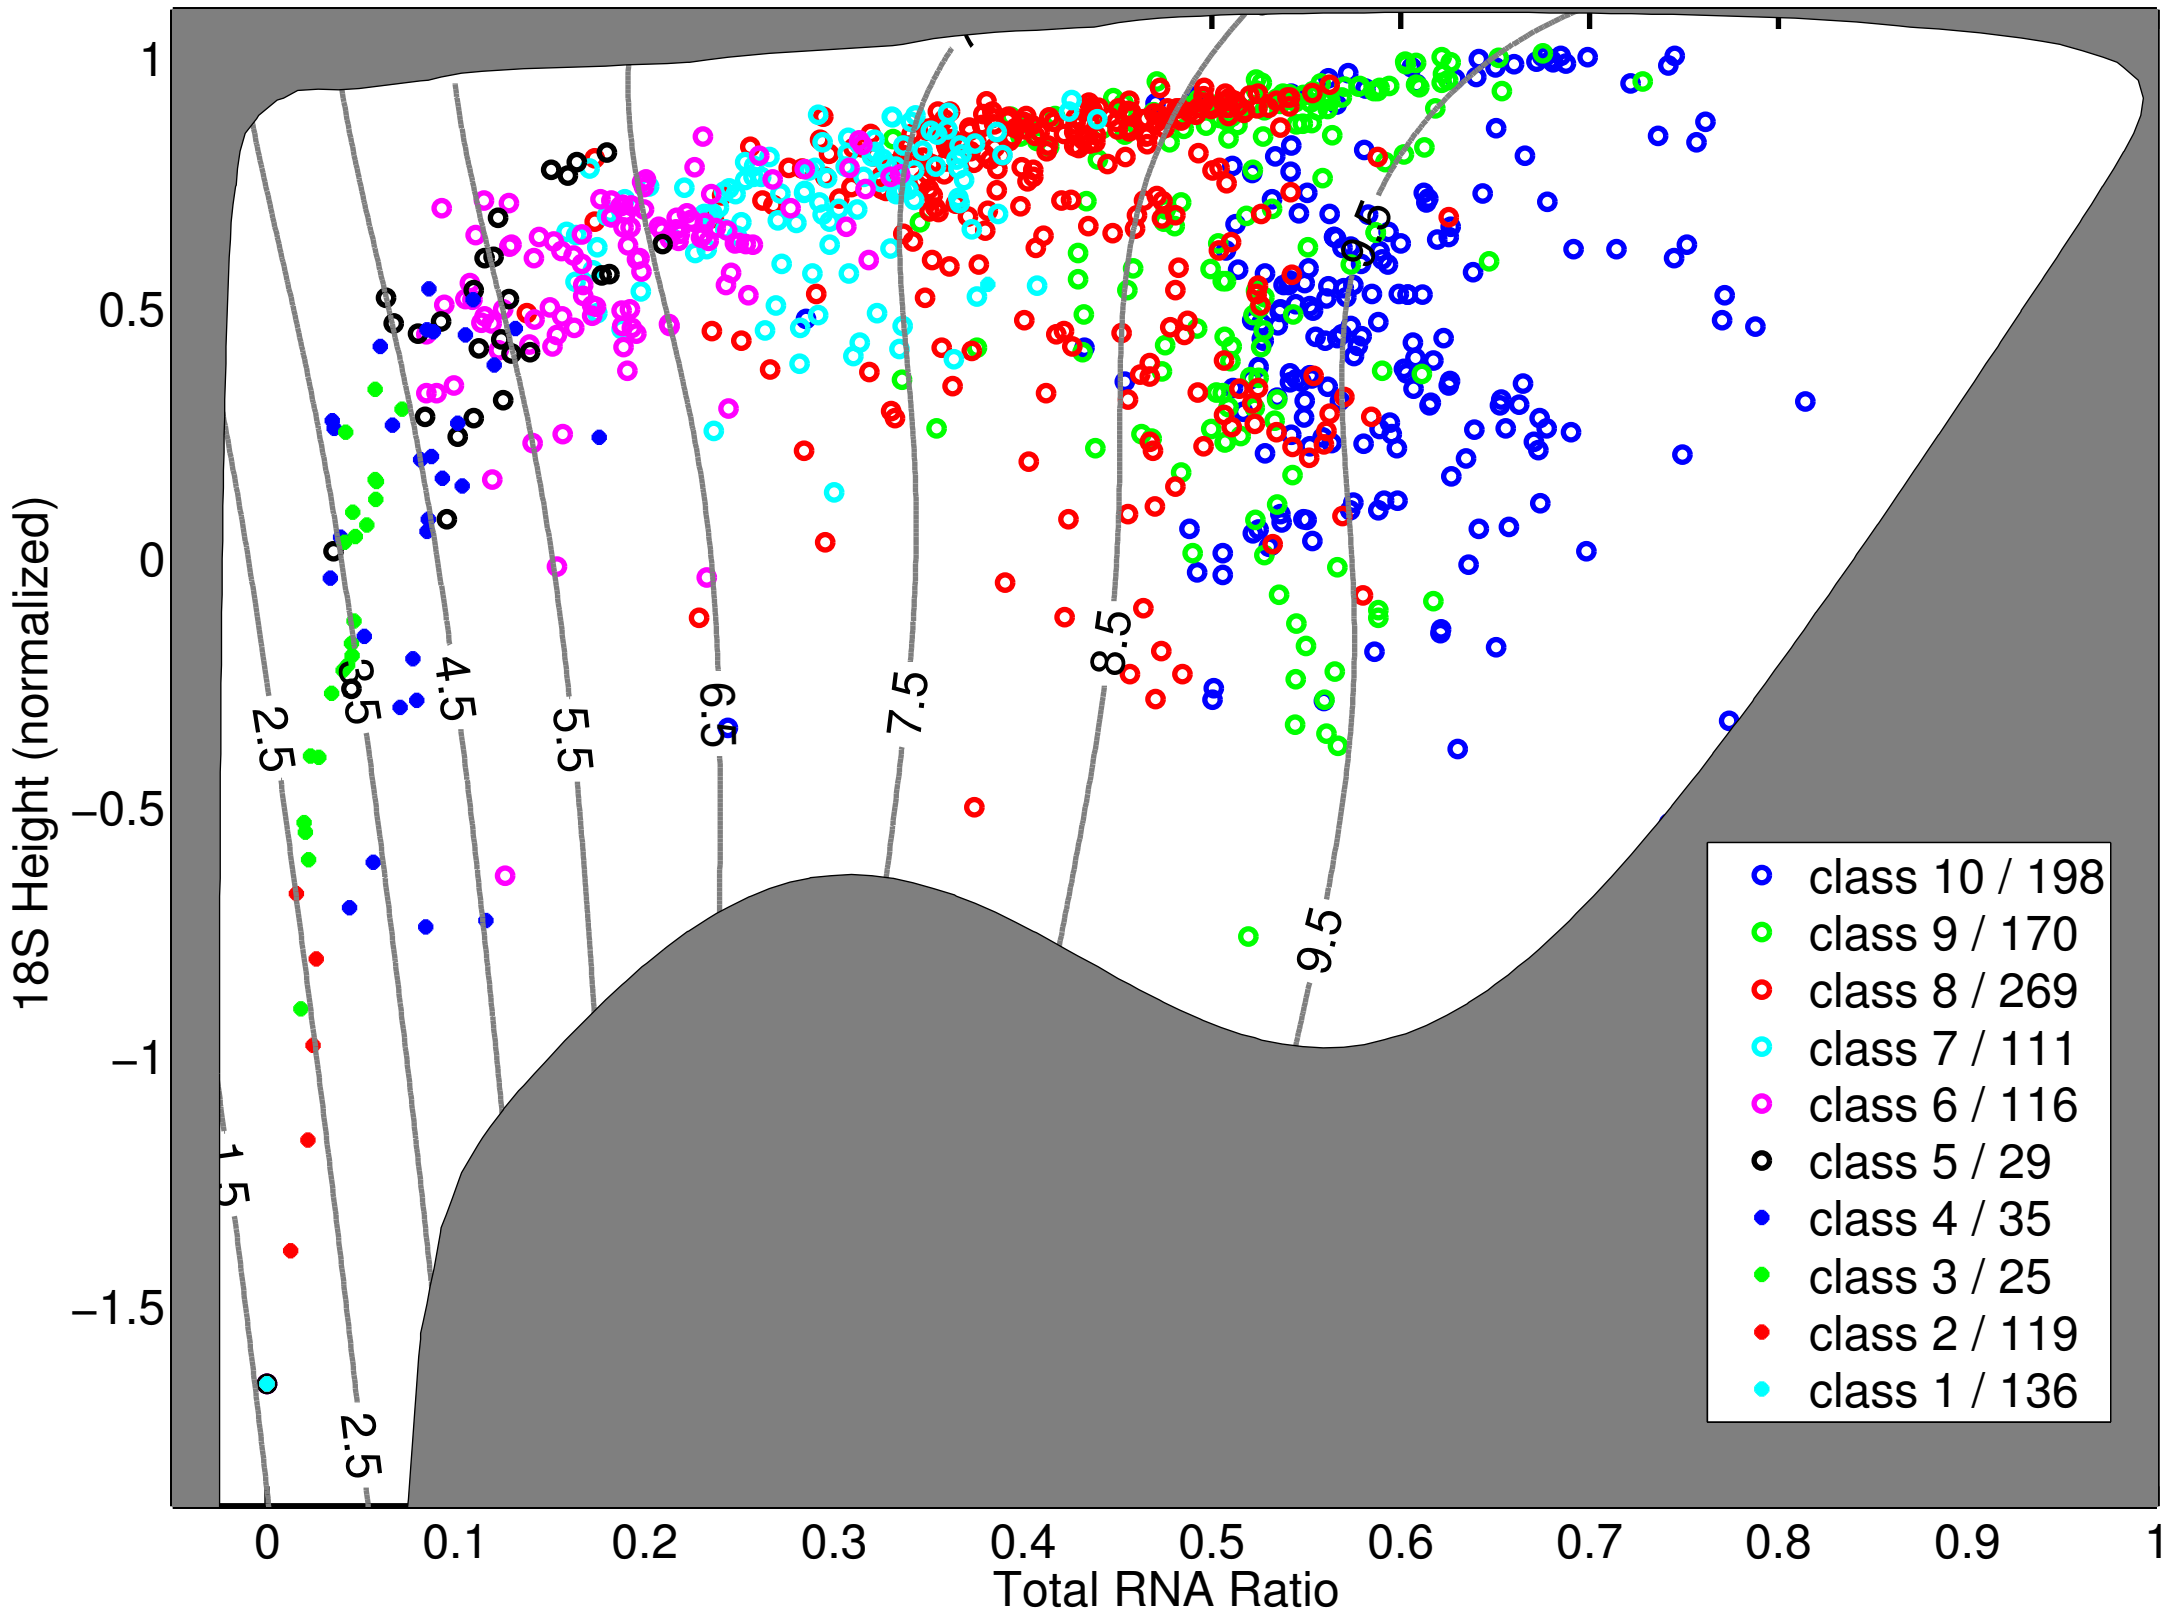

Supplement: 12867_2005_92_MOESM9_ESM.pdf [file 12867_2005_92_MOESM9_ESM.pdf]
